# Supplementary material for: Carbinol derivatives via rhodium-catalyzed addition of potassium trifluoro(organo)borates to aldehydes
Source: Royal Society of Chemistry journal article supplement (doi:10.1039/b506245d), 2005-01-01
Supplement: b506245d.pdf [file b506245d.pdf]

## Carbinol Derivatives via Rhodium-Catalyzed 1,2-Addition of Potassium Trifluoro(organo)borates

Mathieu Pucheault, Sylvain Darses\* and Jean-Pierre Genet\*

Laboratoire de Synthèse Sélective Organique (UMR 7573, CNRS), Ecole Nationale Supérieure de Chimie de Paris, 11 rue P&M Curie, 75231 Paris Cedex 05, France. Fax: +33 1 44 07 10 62; Tel: +33 1 44 27 67 42 or 43; E-mail: sylvain-darses@enscp.fr and jean-pierre-genet@enscp.fr

### Supplementary Information

**General:**  $^1\text{H}$  NMR and  $^{13}\text{C}$  NMR spectra were recorded on a Bruker AC 300 or Avance 400 instruments; chemical shifts ( $\delta$ ) are reported in ppm relative to  $\text{Me}_4\text{Si}$ ; coupling constants ( $J$ ) are reported in Hz and refer to apparent peak multiplicities. Mass spectra were determined on a Ribermag instrument. High resolution mass spectra were performed on a Varian MAT311 at the Université Pierre and Marie Curie (Paris). Elemental analyses were done at the Regional Service of Microanalysis (Université Pierre et Marie Curie). Thin layer chromatography was carried out on silica-gel plates (Merck F<sub>254</sub>), spots were detected with UV light and revealed with  $\text{KMnO}_4$  solution. GC analyses were performed on a Agilent 6850 Series instrument equipped with a capillary column HP-1 (30 m,  $\varnothing = 0.25\ \mu\text{m}$ ), using an ionisation flame detector: program A = 70°C during 1 min then 20°C/min up to 210°C, program B = 70°C during 1 min then 20°C/min up to 250°C. Potassium trifluoro(organo)borates were prepared according to published procedures.<sup>1</sup> Toluene was distilled from  $\text{CaH}_2$ .

**General Procedure:** A septum-capped vial equipped with a magnetic stirring bar was charged with trifluoro-(organo)borate (1 mmol), aryl aldehyde (0.5 mmol) and chlorobis(ethylene)rhodium(I) dimer (7.5  $\mu\text{mol}$ , 2.9 mg). The vial was closed and evacuated under vacuum and placed under an argon atmosphere. Degassed toluene (1.5 ml) and water (1 ml) were added followed by a solution of tri-*tert*-butylphosphane in degassed toluene (15  $\mu\text{mol}$ , 3M solution, 50  $\mu\text{L}$ ). The mixture was stirred in a preheated oil bath at 60°C for the indicated time. After cooling the vessel to room temperature, the reaction mixture was purified by silica gel column chromatography.

**(4-fluorophenyl)-3-thienylmethanol:** Colorless oil (102 mg, 97% yield) obtained from **2d** (1 mmol, 190 mg) and **1f** (0.5 mmol, 62 mg) according to the general procedure.  $R_f = 0.24$  (cyclohexane/AcOEt, 9/1). GC (program B):  $t_R = 7.1$  min.  $^1\text{H}$  NMR (300 MHz,  $\text{CDCl}_3$ ,  $\delta$ ): 2.68 (1H, br s), 5.93 (1H, s), 7.06 (1H, dd,  $J = 1.2$  Hz and 5.0 Hz), 7.13 (2H, dd,  $J = 8.9$  Hz and 9.2 Hz), 7.26 (1H, dd,  $J = 1.2$  Hz and 3.0 Hz), 7.38 (1H, dd,  $J = 5.0$  Hz and 3.0 Hz), 7.44 (2H, dd,  $J = 8.9$  Hz and 5.5 Hz).  $^{13}\text{C}$  NMR (75 MHz,  $\text{CDCl}_3$ ,  $\delta$ ): 72.1, 115.3 (d,  $J_{\text{C-F}} = 21.3$  Hz), 121.7, 126.3, 126.4, 128.2 (d,  $J_{\text{C-F}} = 8.0$  Hz), 139.1 (d,  $J_{\text{C-F}} = 2.8$  Hz), 145.2 ( $\text{C}_6$ ), 165.3 (d,  $J_{\text{C-F}} = 244$  Hz). MS (ICP,  $\text{NH}_3$ ): 208 (5%,  $[\text{M-H}_2\text{O}+\text{NH}_4]^+$ ), 191 (100%,  $[\text{M-H}_2\text{O}+\text{H}]^+$ ).

**(2,4,6-Trimethoxyphenyl)phenylmethanol:**<sup>2</sup> White solid (131 mg, 96% yield) obtained from **2a** (1 mmol, 184 mg) and **1l** (0.5 mmol, 98 mg) according to the general procedure at 40°C. m.p. = 123°C, litt<sup>2</sup>: 124-125°C.  $R_f = 0.41$  ( $\text{CH}_2\text{Cl}_2$ ). GC (program A):  $t_R = 10.0$  min.  $^1\text{H}$  NMR (300 MHz,  $\text{CDCl}_3$ ,  $\delta$ ): 3.75 (6H, s), 3.81 (3H, s), 4.17 (1H, br s), 6.17 (2H, s), 6.36 (1H, s), 7.18–7.37 (5H, m).  $^{13}\text{C}$  NMR (75 MHz,  $\text{CDCl}_3$ ,  $\delta$ ): 55.4, 55.8, 68.3, 91.3, 112.4, 125.7, 126.4, 127.9, 145.3, 158.5, 160.8. MS (EI, 70 eV,  $m/z$ ): 274 (23%), 197 (100%), 179 (21%).

**2,4,6-Trimethoxyphenyl-(2-methylphenyl)methanol:** White solid (122.4 mg, 85% yield) obtained from **2f** (1 mmol, 198 mg) and **1l** (0.5 mmol, 98 mg) according to the general procedure at 40°C. m.p. = 120°C.  $R_f = 0.49$  ( $\text{CH}_2\text{Cl}_2$ ). GC (program A):  $t_R = 10.2$  min.  $^1\text{H}$  NMR (300 MHz,  $\text{CDCl}_3$ ,  $\delta$ ): 2.48 (3H, s), 3.76 (6H, s), 3.83 (3H, s), 4.10 (1H, br s), 6.19 (2H, s), 6.35 (1H, s), 7.10–7.16 (4H, m).  $^{13}\text{C}$  NMR (75 MHz,  $\text{CDCl}_3$ ,  $\delta$ ): 55.4, 55.8, 66.9, 91.2, 110.9, 125.2, 126.4, 127.0, 130.4, 137.2, 141.7, 158.8, 160.7. MS (IE, 70 eV,  $m/z$ ): 288 (6%), 197 (100%), 169 (89%). HRMS ( $m/z$ ): calcd for  $\text{C}_{17}\text{H}_{20}\text{O}_4$  288.1362, found 288.1363.

**2,4,6-Trimethoxyphenyl-(2,6-dimethylphenyl)methanol:**<sup>3</sup> White solid obtained from **2g** (1 mmol, 212 mg) and **1l** (0.5 mmol, 98 mg) according to the general procedure at 40°C (143.5 mg, 63% yield). m.p. = 122°C.  $R_f$  ( $\text{CH}_2\text{Cl}_2$ ) = 0.52. GC (program A):  $t_R = 10.4$  min.  $^1\text{H}$  NMR (300 MHz,  $\text{CDCl}_3$ ,  $\delta$ ): 2.37 (6H, s), 3.71 (6H, s), 3.80 (3H, s), 4.80 (1H, br s), 6.15 (2H, s), 6.49 (1H, s), 6.96–7.00 (3H, m).  $^{13}\text{C}$  NMR (75 MHz,  $\text{CDCl}_3$ ,  $\delta$ ): 55.4, 55.8,

<sup>1</sup> S. Darses, G. Michaud, J.-P. Genet, *Eur. J. Org. Chem.*, 1999, 1875.

<sup>2</sup> J. Kenyon, R. F. Mason, *J. Chem. Soc.* 1952, 4964.

<sup>3</sup> P. Finocchiaro, D. Gust, W. D. Hounshell, J. P. Hummel, P. Maravigna, K. Mislow, *J. Am. Chem. Soc.*, 1976, **98**, 4945.

68.3, 91.3, 112.4, 125.7, 126.4, 127.9, 145.3, 158.5, 160.8. MS (IE, m/z) : 302 (4%), 197 (94%), 169 (100%). HRMS (m/z): calcd for C<sub>18</sub>H<sub>22</sub>O<sub>4</sub> 302.1518 found 302.1527.

All other products were identified by comparison of spectroscopic data with authentic sample or with those reported in the literature: entry 1<sup>4</sup> [720-44-5], entry 2<sup>5</sup> [33091-15-5], entry 3<sup>6</sup> [87901-71-1], entry 4 [119-56-2], entry 5 [29334-16-5], entry 6<sup>7</sup> [2795-76-8], entry 7<sup>8</sup> [22788-49-4], entry 8<sup>9</sup> [833-39-6], entry 9<sup>10</sup> [7765-98-2], entry 10<sup>11</sup> [4484-57-5], entry 12<sup>12</sup> [104449-55-0], entry 13,<sup>13</sup> and Eqn. 4<sup>14</sup> [4471-05-0].

---

<sup>4</sup> A. Fuerstner, H. Krause, *Adv. Synth. Catal.*, 2001, **343**, 343.

<sup>5</sup> P. Strazzolini, A. G. Giumanini, G. Verardo, *Tetrahedron*, 1994, **50**, 217.

<sup>6</sup> T. V. Pham, R. A. McClelland, *Can. J. Chem.*, 2001, **79**, 1887.

<sup>7</sup> J. M. Gascoyne, P. J. Mitchell, L. Phillips, *J. Chem. Soc. Perkin Trans. 2*, 1977, 1051.

<sup>8</sup> P. J. Wagner, M. A. Meador, B.-S. Park, *J. Am. Chem. Soc.*, 1990, **112**, 5199.

<sup>9</sup> K. Hattori, H. Sajiki, K. Hirota, *Tetrahedron*, 2001, **57**, 4817.

<sup>10</sup> I. M. Pastor, M. Yus, *Tetrahedron*, 2001, **57**, 2365.

<sup>11</sup> B. Martin-Matute, C. Nevado, D. J. Cardenas, A. M. Echavarren, *J. Am. Chem. Soc.*, 2003, **125**, 5757.

<sup>12</sup> B. Ben Hassine, M. Gorsane, J. Pecher, R. H. Martin, *Bull. Soc. Chim. Belg.*, 1985, **94**, 597.

<sup>13</sup> J. H. Hall, F. E. Behr, R. L. Reed, *J. Am. Chem. Soc.*, 1972, **94**, 4952.

<sup>14</sup> D. Lefort, J. Y. Nedelec, *Tetrahedron*, 1982, **38**, 2681.
